# Supplementary material for: A Study on Non-Synonymous Mutational Patterns in Structural Proteins of SARS-COV-2
Source: Preprints.org preprint supplement (doi:10.20944/preprints202008.0621.v2), 2021-03-04
Supplement: Supplementary file 4 [file Supplementary-B.xlsx]

## Sheet: Sheet1
A study on non-synonymous mutational patterns in structural proteins of SARS-CoV-2 Jayanta Kumar Das, Swarup Roy
Protein	Variant	Sample frequency	Substitutions list	# Substitutions
S	V2	4208	D>G(614)	1
S	V3	53	L>F(54);D>G(614)	2
S	V4	39	L>F(5);D>G(614)	2
S	V5	37	S>N(477);D>G(614)	2
S	V6	37	A>T(829)	1
S	V7	24	L>F(5)	1
S	V8	22	V>A(483)	1
S	V9	21	H>Y(146);D>G(614)	2
S	V10	17	S>L(221);D>G(614)	2
S	V11	16	D>G(614);P>L(681)	2
S	V12	14	D>G(253);D>G(614)	2
S	V13	13	D>G(614);Q>H(677)	2
S	V14	13	N>Y(501);D>G(614)	2
S	V15	11	T>I(572);D>G(614)	2
S	V16	11	E>D(583);D>G(614)	2
S	V17	10	D>H(138);E>D(554);D>G(614)	3
S	V18	8	Q>H(14);D>G(614)	2
S	V19	8	R>M(78);D>G(614)	2
S	V20	8	V>L(308);D>G(614)	2
S	V21	8	R>K(403);D>G(614)	2
S	V22	7	G>V(1124)	1
S	V23	7	A>S(845)	1
S	V24	7	D>G(614);P>L(1263)	2
S	V25	7	D>G(614);A>D(845)	2
S	V26	6	T>I(791)	1
S	V27	6	G>D(838)	1
S	V28	6	H>Y(655)	1
S	V29	6	D>G(614);T>I(859);P>L(1263)	3
S	V30	6	D>G(614);S>F(939)	2
S	V31	6	G>S(476)	1
S	V32	6	F>L(220);D>G(614)	2
S	V33	6	D>H(138);D>G(614)	2
S	V34	6	H>Y(49);D>G(614)	2
S	V35	5	M>I(153);D>G(614)	2
S	V36	5	D>G(614);L>F(1203)	2
S	V37	5	D>G(614);G>V(1124)	2
S	V38	5	A>S(520)	1
S	V39	4	T>I(29)	1
S	V40	4	S>L(50);D>G(614)	2
S	V41	4	L>F(54)	1
S	V42	4	Y>H(145);D>G(614)	2
S	V43	4	L>F(216);D>G(614)	2
S	V44	4	W>L(258);D>G(614)	2
S	V45	4	D>G(614);Q>H(675)	2
S	V46	4	A>T(262);D>G(614)	2
S	V47	3	L>F(5);H>Y(146);D>G(614)	3
S	V48	3	T>I(22)	1
S	V49	3	S>F(71)	1
S	V50	3	S>P(494);D>G(614)	2
S	V51	3	T>I(547);D>G(614)	2
S	V52	3	S>L(704)	1
S	V53	3	S>F(940)	1
S	V54	3	D>N(1260)	1
S	V55	3	G>R(1085)	1
S	V56	3	D>G(614);Q>L(836)	2
S	V57	3	D>G(614);S>I(929)	2
S	V58	3	D>G(614);H>Y(1101)	2
S	V59	3	D>G(614);A>S(1078)	2
S	V60	3	D>G(614);A>S(879)	2
S	V61	3	A>S(262)	1
S	V62	3	I>V(197)	1
S	V63	3	L>V(8)	1
S	V64	2	L>F(5);T>I(95);D>G(614)	3
S	V65	2	L>F(5);G>S(476)	2
S	V66	2	S>F(12);D>G(614)	2
S	V67	2	L>F(18);D>G(614)	2
S	V68	2	T>I(22);E>K(180)	2
S	V69	2	T>N(22);D>G(614);S>L(698)	3
S	V70	2	P>L(26);D>G(614)	2
S	V71	2	T>I(29);D>G(614)	2
S	V72	2	N>K(74)	1
S	V73	2	T>I(95);D>G(614)	2
S	V74	2	T>I(95);D>H(138);E>D(554);D>G(614)	4
S	V75	2	S>F(98);D>G(614)	2
S	V76	2	W>L(152);D>G(614)	2
S	V77	2	M>I(177);D>G(614)	2
S	V78	2	R>L(214);D>G(614)	2
S	V79	2	S>F(255);D>G(614)	2
S	V80	2	P>L(384);D>G(614)	2
S	V81	2	R>I(408);D>G(614)	2
S	V82	2	T>I(553);D>G(614)	2
S	V83	2	E>D(583);D>G(614);Q>R(675)	3
S	V84	2	Q>H(677)	1
S	V85	2	M>I(731)	1
S	V86	2	T>I(1136)	1
S	V87	2	D>G(614);S>F(640)	2
S	V88	2	D>G(614);T>I(676);P>L(1162)	3
S	V89	2	D>G(614);Q>H(677);V>L(1230)	3
S	V90	2	D>G(614);G>D(838)	2
S	V91	2	D>G(614);L>F(922)	2
S	V92	2	D>G(614);V>L(1065)	2
S	V93	2	D>G(614);V>L(1104)	2
S	V94	2	D>G(614);V>L(1122)	2
S	V95	2	D>G(614);K>N(1191)	2
S	V96	2	D>G(614);A>V(1078)	2
S	V97	2	D>G(614);A>V(1020)	2
S	V98	2	D>G(614);I>V(931)	2
S	V99	2	D>G(614);A>V(846)	2
S	V100	2	D>G(614);P>S(812)	2
S	V101	2	D>G(614);A>S(783)	2
S	V102	2	A>V(570);D>G(614)	2
S	V103	2	P>S(330);D>G(614)	2
S	V104	2	R>S(273);D>G(614)	2
S	V105	2	I>M(203);D>G(614)	2
S	V106	2	D>H(138);E>D(554);D>G(614);V>A(1129)	4
S	V107	2	D>N(111)	1
S	V108	2	D>Y(88);D>G(614);C>F(1250)	3
S	V109	2	D>Y(80)	1
S	V110	2	H>Y(69);D>G(614)	2
S	V111	2	H>Y(49)	1
S	V112	2	F>L(32);D>G(614)	2
S	V113	2	A>S(27);D>G(614)	2
S	V114	2	P>S(25);D>G(614)	2
S	V115	1	L>F(5);S>F(98);D>G(614)	3
S	V116	1	L>F(5);M>I(153)	2
S	V117	1	L>F(5);S>I(162);D>G(614)	3
S	V118	1	L>F(5);T>I(572);D>G(614)	3
S	V119	1	P>L(9)	1
S	V120	1	S>C(12);D>G(614)	2
S	V121	1	S>F(12);D>G(614);Q>H(677)	3
S	V122	1	S>I(13);D>G(614)	2
S	V123	1	Q>H(14);D>G(614);D>Y(1118)	3
S	V124	1	N>K(17);D>G(614)	2
S	V125	1	L>F(18)	1
S	V126	1	R>I(21);D>G(614)	2
S	V127	1	T>A(22)	1
S	V128	1	P>L(25);V>F(367);R>Q(682);Q>E(1002)	4
S	V129	1	P>L(25);V>F(367);R>Q(682)	3
S	V130	1	Y>H(28)	1
S	V131	1	Y>H(28);D>G(614)	2
S	V132	1	Y>N(28)	1
S	V133	1	T>I(29);D>G(614);S>L(704)	3
S	V134	1	T>I(29);D>G(614);S>L(704);G>V(1124)	4
S	V135	1	Y>C(38);F>S(86);T>I(95);E>G(96);S>G(151);N>K(185)	6
S	V136	1	S>L(50)	1
S	V137	1	S>L(50);D>G(614);G>V(1124)	3
S	V138	1	S>L(50);G>V(142);D>G(614)	3
S	V139	1	L>F(54);S>I(155);D>G(614)	3
S	V140	1	L>F(54);W>L(258);D>G(614)	3
S	V141	1	L>F(54);D>G(614);Q>H(690)	3
S	V142	1	L>F(54);E>Q(471);D>G(614)	3
S	V143	1	V>F(70)	1
S	V144	1	T>I(76);T>I(791)	2
S	V145	1	R>M(78);D>G(614);H>Q(1083)	3
S	V146	1	D>A(88);D>G(614)	2
S	V147	1	V>F(90);D>G(614)	2
S	V148	1	E>D(96)	1
S	V149	1	S>F(98)	1
S	V150	1	R>I(102);D>G(614)	2
S	V151	1	L>F(118);D>G(614)	2
S	V152	1	V>F(127);D>G(614);T>I(791)	3
S	V153	1	E>D(132);D>G(614)	2
S	V154	1	S>I(151);D>G(614)	2
S	V155	1	W>R(152)	1
S	V156	1	M>I(153);A>S(845)	2
S	V157	1	S>I(155);D>G(614)	2
S	V158	1	E>D(156);D>G(614)	2
S	V159	1	Q>H(173);D>G(614)	2
S	V160	1	L>F(176);D>G(614)	2
S	V161	1	L>I(176);A>S(845)	2
S	V162	1	N>D(188);D>G(614)	2
S	V163	1	N>K(188);D>G(614)	2
S	V164	1	R>K(190)	1
S	V165	1	Y>S(200);I>S(818);V>L(1104)	3
S	V166	1	V>L(213);D>G(614)	2
S	V167	1	Q>L(218);D>G(614)	2
S	V168	1	S>L(221)	1
S	V169	1	S>L(221);D>G(614);S>F(691)	3
S	V170	1	T>I(240)	1
S	V171	1	T>I(240);D>G(614)	2
S	V172	1	L>F(242);D>G(614)	2
S	V173	1	S>R(247)	1
S	V174	1	Y>H(248);G>S(594);D>G(614);Q>R(675)	4
S	V175	1	S>F(254)	1
S	V176	1	S>F(254);D>G(614)	2
S	V177	1	W>L(258)	1
S	V178	1	Y>C(265)	1
S	V179	1	V>L(267);D>G(614);A>D(845)	3
S	V180	1	R>M(273);F>Y(275);L>I(276);S>I(750)	4
S	V181	1	Y>N(279)	1
S	V182	1	T>I(307);T>I(572);D>G(614)	3
S	V183	1	Q>K(314);D>G(614)	2
S	V184	1	Q>L(314);D>G(614)	2
S	V185	1	T>I(315);D>G(614)	2
S	V186	1	Q>L(321);D>G(614)	2
S	V187	1	T>I(323);D>G(614)	2
S	V188	1	T>I(323);D>G(614);C>F(1248)	3
S	V189	1	T>S(345);D>G(614)	2
S	V190	1	N>K(354);D>G(614)	2
S	V191	1	V>F(367)	1
S	V192	1	V>F(367);D>G(614)	2
S	V193	1	V>E(382);D>G(614)	2
S	V194	1	V>L(382);A>V(570);D>G(614)	3
S	V195	1	T>P(393);D>G(614)	2
S	V196	1	R>K(457);D>G(614)	2
S	V197	1	V>A(483);V>A(622)	2
S	V198	1	V>F(483);D>G(614)	2
S	V199	1	K>E(529);D>G(614)	2
S	V200	1	T>I(547)	1
S	V201	1	T>N(553)	1
S	V202	1	P>L(561)	1
S	V203	1	Q>H(580);D>G(614)	2
S	V204	1	E>D(583)	1
S	V205	1	E>D(583);D>G(614);Q>K(1201)	3
S	V206	1	E>D(583);D>G(614);H>Q(1083)	3
S	V207	1	L>F(611);D>G(614)	2
S	V208	1	Q>H(613);D>G(614)	2
S	V209	1	Q>K(675)	1
S	V210	1	S>R(750);L>R(752)	2
S	V211	1	V>I(772)	1
S	V212	1	F>C(797)	1
S	V213	1	V>L(1122)	1
S	V214	1	G>C(1219)	1
S	V215	1	V>L(1228)	1
S	V216	1	M>I(1237)	1
S	V217	1	D>H(1259)	1
S	V218	1	C>F(1254)	1
S	V219	1	C>Y(1250)	1
S	V220	1	G>V(1219)	1
S	V221	1	K>N(1205)	1
S	V222	1	N>T(1192)	1
S	V223	1	D>H(1168)	1
S	V224	1	D>G(1163)	1
S	V225	1	P>S(1162)	1
S	V226	1	A>S(1078)	1
S	V227	1	A>V(1078)	1
S	V228	1	A>V(930)	1
S	V229	1	A>V(845)	1
S	V230	1	G>S(838)	1
S	V231	1	P>S(812)	1
S	V232	1	D>G(745)	1
S	V233	1	A>T(684)	1
S	V234	1	R>W(682);T>I(791)	2
S	V235	1	A>V(653)	1
S	V236	1	D>G(614);V>F(615)	2
S	V237	1	D>G(614);V>F(622)	2
S	V238	1	D>G(614);V>I(622)	2
S	V239	1	D>G(614);S>A(640)	2
S	V240	1	D>G(614);T>S(676)	2
S	V241	1	D>G(614);S>L(698)	2
S	V242	1	D>G(614);S>F(708)	2
S	V243	1	D>G(614);T>A(724)	2
S	V244	1	D>G(614);M>I(731)	2
S	V245	1	D>G(614);T>A(732)	2
S	V246	1	D>G(614);M>I(740);D>N(1260)	3
S	V247	1	D>G(614);N>D(751);L>F(1141)	3
S	V248	1	D>G(614);R>L(765)	2
S	V249	1	D>G(614);T>I(768)	2
S	V250	1	D>G(614);T>I(778)	2
S	V251	1	D>G(614);Y>D(789)	2
S	V252	1	D>G(614);T>I(791);A>S(1020)	3
S	V253	1	D>G(614);T>I(827)	2
S	V254	1	D>G(614);G>C(832)	2
S	V255	1	D>G(614);Q>P(836)	2
S	V256	1	D>G(614);T>I(859)	2
S	V257	1	D>G(614);L>F(981)	2
S	V258	1	D>G(614);L>F(1063)	2
S	V259	1	D>G(614);T>I(1120)	2
S	V260	1	D>G(614);P>L(1143)	2
S	V261	1	D>G(614);V>F(1176)	2
S	V262	1	D>G(614);N>K(1187)	2
S	V263	1	D>G(614);V>L(1264)	2
S	V264	1	D>G(614);D>H(1260)	2
S	V265	1	D>G(614);C>F(1250)	2
S	V266	1	D>G(614);C>F(1247)	2
S	V267	1	D>G(614);G>S(1246)	2
S	V268	1	D>G(614);C>F(1243)	2
S	V269	1	D>G(614);M>T(1237)	2
S	V270	1	D>G(614);E>Q(1195)	2
S	V271	1	D>G(614);N>Y(1187)	2
S	V272	1	D>G(614);K>R(1181)	2
S	V273	1	D>G(614);P>S(1162)	2
S	V274	1	D>G(614);F>L(1109)	2
S	V275	1	D>G(614);H>Y(1101);K>N(1191)	3
S	V276	1	D>G(614);P>S(1079)	2
S	V277	1	D>G(614);S>Y(939)	2
S	V278	1	D>G(614);D>Y(936)	2
S	V279	1	D>G(614);A>V(924)	2
S	V280	1	D>G(614);A>S(892)	2
S	V281	1	D>G(614);A>V(892)	2
S	V282	1	D>G(614);A>V(879)	2
S	V283	1	D>G(614);K>R(854)	2
S	V284	1	D>G(614);A>V(845)	2
S	V285	1	D>G(614);D>N(839)	2
S	V286	1	D>G(614);I>V(818)	2
S	V287	1	D>G(614);P>S(809)	2
S	V288	1	D>G(614);D>G(808)	2
S	V289	1	D>G(614);K>Q(795)	2
S	V290	1	D>G(614);G>V(769)	2
S	V291	1	D>G(614);R>S(765)	2
S	V292	1	D>G(614);A>S(706)	2
S	V293	1	D>G(614);A>S(706);C>F(1243)	3
S	V294	1	D>G(614);A>V(701)	2
S	V295	1	D>G(614);A>V(688)	2
S	V296	1	D>G(614);A>S(684)	2
S	V297	1	D>G(614);A>V(684)	2
S	V298	1	D>G(614);R>W(682);T>I(859);P>L(1263)	4
S	V299	1	D>G(614);Q>R(677)	2
S	V300	1	D>G(614);Q>R(675)	2
S	V301	1	D>G(614);A>V(672)	2
S	V302	1	D>G(614);H>Y(655)	2
S	V303	1	D>G(614);A>S(647)	2
S	V304	1	D>G(614);P>S(631)	2
S	V305	1	D>G(614);A>V(626)	2
S	V306	1	D>G(614);A>S(623)	2
S	V307	1	D>G(614);P>S(621)	2
S	V308	1	D>Y(574);E>D(583);D>G(614);D>Y(1153)	4
S	V309	1	D>Y(574);D>G(614)	2
S	V310	1	A>S(570);D>G(614)	2
S	V311	1	A>V(570)	1
S	V312	1	K>R(558)	1
S	V313	1	A>S(522);D>G(614)	2
S	V314	1	A>V(522)	1
S	V315	1	A>S(520);D>G(614)	2
S	V316	1	H>Q(519)	1
S	V317	1	H>Q(519);D>G(614)	2
S	V318	1	G>R(485)	1
S	V319	1	C>F(379);D>G(614);P>L(1263)	3
S	V320	1	A>S(348);D>G(614)	2
S	V321	1	A>T(348)	1
S	V322	1	E>Q(309)	1
S	V323	1	E>G(298);D>G(614)	2
S	V324	1	E>K(298);K>N(300);T>L(302);L>R(752);P>T(812)	5
S	V325	1	A>T(288);Q>R(314);D>G(614)	3
S	V326	1	Q>R(271);D>G(614)	2
S	V327	1	A>S(262);D>G(614)	2
S	V328	1	G>R(261);D>G(614)	2
S	V329	1	G>S(252);D>G(614)	2
S	V330	1	H>R(245)	1
S	V331	1	Q>R(239);D>G(614)	2
S	V332	1	A>P(222);D>G(614)	2
S	V333	1	A>V(222);D>G(614)	2
S	V334	1	F>L(220);L>I(441);D>G(614)	3
S	V335	1	F>L(220);D>G(614);V>F(622)	3
S	V336	1	F>L(220);D>G(614);R>L(1091)	3
S	V337	1	N>Y(211);D>G(614)	2
S	V338	1	D>N(178);G>R(485);D>G(614)	3
S	V339	1	R>S(158)	1
S	V340	1	F>L(157)	1
S	V341	1	F>L(157);D>G(614);V>L(1122)	3
S	V342	1	N>S(148)	1
S	V343	1	N>S(148);P>S(1162)	2
S	V344	1	N>Y(148);D>G(614)	2
S	V345	1	K>T(97);D>G(614)	2
S	V346	1	G>V(75);D>G(614)	2
S	V347	1	G>V(75);D>G(614);A>S(783);S>F(939)	4
S	V348	1	A>S(67);F>L(1103)	2
S	V349	1	A>V(67);D>G(253);D>G(614)	3
S	V350	1	H>Y(49);T>I(76);D>G(614)	3
S	V351	1	H>Y(49);S>F(884)	2
S	V352	1	F>L(32);D>G(614);V>L(1228)	3
S	V353	1	A>V(27)	1
S	V354	1	L>V(7);D>G(614)	2
S	V355	1	F>L(2);D>G(614)	2
N	v2	766	R>K(203);G>R(204)	2
N	v3	153	S>L(194)	1
N	v4	77	P>L(13)	1
N	v5	75	S>F(235)	1
N	v6	47	S>N(202)	1
N	v7	44	A>G(208)	1
N	v8	34	E>V(62)	1
N	v9	33	S>Y(183)	1
N	v10	28	P>L(13);S>L(197)	2
N	v11	27	T>I(205)	1
N	v12	22	S>L(197)	1
N	v13	17	E>A(378)	1
N	v14	16	R>K(203);G>R(204);I>T(292)	3
N	v15	16	T>I(362)	1
N	v16	13	R>C(185)	1
N	v17	13	D>G(22)	1
N	v18	11	D>Y(371)	1
N	v19	10	G>C(18)	1
N	v20	10	R>K(203);G>R(204);Q>H(229)	3
N	v21	10	P>S(383)	1
N	v22	10	D>Y(144)	1
N	v23	9	P>S(368)	1
N	v24	8	S>I(180)	1
N	v25	7	S>P(188)	1
N	v26	7	R>I(209)	1
N	v27	7	S>L(327)	1
N	v28	6	S>L(188)	1
N	v29	6	S>I(190)	1
N	v30	6	A>G(208);T>I(393)	2
N	v31	6	E>V(62);S>L(194)	2
N	v32	5	R>I(89)	1
N	v33	5	S>F(186)	1
N	v34	5	R>K(203);G>R(204);T>I(205)	3
N	v35	5	Q>H(229)	1
N	v36	4	L>F(139)	1
N	v37	4	R>L(185)	1
N	v38	4	S>I(193)	1
N	v39	4	R>K(203);G>R(204);D>G(377)	3
N	v40	4	P>L(326)	1
N	v41	4	K>R(169);R>K(203);G>R(204)	3
N	v42	4	A>V(155)	1
N	v43	4	A>V(119)	1
N	v44	3	R>I(195)	1
N	v45	3	R>M(203)	1
N	v46	3	M>I(234);T>I(334)	2
N	v47	3	M>I(234)	1
N	v48	3	T>I(271)	1
N	v49	3	P>L(365)	1
N	v50	3	Q>H(384)	1
N	v51	3	A>V(381)	1
N	v52	3	N>Y(228)	1
N	v53	3	N>Y(213)	1
N	v54	3	R>S(203)	1
N	v55	3	A>S(156);S>L(194)	2
N	v56	3	P>S(142)	1
N	v57	3	D>Y(128)	1
N	v58	3	P>T(67)	1
N	v59	2	T>I(24)	1
N	v60	2	S>I(33)	1
N	v61	2	I>F(146)	1
N	v62	2	T>I(166)	1
N	v63	2	R>C(185);R>K(203);G>R(204)	3
N	v64	2	S>N(193)	1
N	v65	2	R>K(203)	1
N	v66	2	R>K(203);G>R(204);G>C(243)	3
N	v67	2	G>C(212)	1
N	v68	2	G>C(238)	1
N	v69	2	T>I(247)	1
N	v70	2	S>F(255)	1
N	v71	2	Q>H(289)	1
N	v72	2	Y>H(298)	1
N	v73	2	T>I(334)	1
N	v74	2	P>L(364)	1
N	v75	2	Q>H(386)	1
N	v76	2	T>I(391)	1
N	v77	2	T>I(393)	1
N	v78	2	S>L(416)	1
N	v79	2	D>Y(402)	1
N	v80	2	A>S(397)	1
N	v81	2	D>Y(377)	1
N	v82	2	P>S(365)	1
N	v83	2	P>S(344)	1
N	v84	2	D>N(340)	1
N	v85	2	G>S(200)	1
N	v86	2	P>S(199)	1
N	v87	2	A>S(156);R>K(203);G>R(204)	3
N	v88	2	A>S(156)	1
N	v89	2	A>S(152)	1
N	v90	2	D>H(144)	1
N	v91	2	P>S(67)	1
N	v92	2	A>S(35)	1
N	v93	2	G>L(34)	1
N	v94	2	G>W(34)	1
N	v95	2	D>Y(22)	1
N	v96	2	G>R(19)	1
N	v97	2	P>T(13)	1
N	v98	1	N>D(4)	1
N	v99	1	P>L(6);S>R(232)	2
N	v100	1	Q>H(9)	1
N	v101	1	P>L(13);D>Y(297)	2
N	v102	1	P>L(13);A>S(152)	2
N	v103	1	P>L(13);R>S(92)	2
N	v104	1	R>H(14)	1
N	v105	1	P>L(20)	1
N	v106	1	P>L(20);N>S(192)	2
N	v107	1	G>F(25)	1
N	v108	1	G>A(30)	1
N	v109	1	R>L(32)	1
N	v110	1	R>L(36);S>N(202)	2
N	v111	1	S>L(37)	1
N	v112	1	R>C(40)	1
N	v113	1	R>L(40)	1
N	v114	1	Q>H(70);R>K(203);G>R(204)	3
N	v115	1	R>L(95);R>K(203);G>R(204)	3
N	v116	1	S>N(105)	1
N	v117	1	P>L(122)	1
N	v118	1	T>I(135)	1
N	v119	1	L>F(139);S>L(194)	2
N	v120	1	P>L(151)	1
N	v121	1	Q>K(163);S>L(197)	2
N	v122	1	T>I(165)	1
N	v123	1	L>F(167);R>K(203);G>R(204)	3
N	v124	1	S>G(180);R>K(203);G>R(204)	3
N	v125	1	R>C(185);G>R(204)	2
N	v126	1	S>L(187);R>K(203);G>R(204)	3
N	v127	1	S>L(187)	1
N	v128	1	S>I(190);Q>L(260)	2
N	v129	1	R>H(191)	1
N	v130	1	R>L(191);R>K(203);G>R(204)	3
N	v131	1	R>L(191)	1
N	v132	1	S>I(193);R>K(203);G>R(204)	3
N	v133	1	S>L(194);S>N(202)	2
N	v134	1	S>L(194);R>G(203);G>R(204)	3
N	v135	1	S>L(194);V>L(270);T>I(271)	3
N	v136	1	S>L(194);T>I(362)	2
N	v137	1	S>L(194);P>L(383)	2
N	v138	1	S>L(194);Q>H(386)	2
N	v139	1	S>L(194);S>I(413)	2
N	v140	1	S>L(194);D>Y(348)	2
N	v141	1	S>L(194);H>Y(300)	2
N	v142	1	S>L(194);A>V(218)	2
N	v143	1	R>K(195)	1
N	v144	1	T>I(198);R>K(203);G>R(204)	3
N	v145	1	T>I(198)	1
N	v146	1	R>K(203);A>G(208)	2
N	v147	1	R>K(203);G>R(204);L>F(230)	3
N	v148	1	R>K(203);G>R(204);P>R(364)	3
N	v149	1	R>K(203);G>R(204);D>Y(348);K>N(373)	4
N	v150	1	R>K(203);G>R(204);M>V(322)	3
N	v151	1	R>K(203);G>R(204);I>T(292);R>I(385)	4
N	v152	1	R>K(203);G>R(204);A>G(208)	3
N	v153	1	R>M(203);E>A(378)	2
N	v154	1	T>I(205);A>G(208)	2
N	v155	1	P>L(207)	1
N	v156	1	R>K(209)	1
N	v157	1	M>I(210)	1
N	v158	1	G>C(215)	1
N	v159	1	S>I(232)	1
N	v160	1	S>R(232)	1
N	v161	1	S>P(235)	1
N	v162	1	G>C(236)	1
N	v163	1	G>C(243)	1
N	v164	1	V>A(246)	1
N	v165	1	S>F(250);V>L(270)	2
N	v166	1	S>A(255)	1
N	v167	1	Q>E(260)	1
N	v168	1	T>I(282)	1
N	v169	1	G>E(284)	1
N	v170	1	Q>L(289)	1
N	v171	1	Q>L(294)	1
N	v172	1	W>C(301);P>S(383)	2
N	v173	1	P>L(309)	1
N	v174	1	G>D(321)	1
N	v175	1	M>I(322)	1
N	v176	1	T>I(325)	1
N	v177	1	T>M(329)	1
N	v178	1	W>L(330)	1
N	v179	1	I>F(337)	1
N	v180	1	K>I(361)	1
N	v181	1	T>I(379)	1
N	v182	1	Q>H(380)	1
N	v183	1	P>L(383)	1
N	v184	1	Q>K(386)	1
N	v185	1	S>I(413)	1
N	v186	1	D>Y(401)	1
N	v187	1	D>E(399)	1
N	v188	1	D>H(399)	1
N	v189	1	A>S(398)	1
N	v190	1	A>V(398)	1
N	v191	1	D>G(377)	1
N	v192	1	A>S(376)	1
N	v193	1	K>N(373)	1
N	v194	1	K>R(372)	1
N	v195	1	D>H(348)	1
N	v196	1	D>Y(348)	1
N	v197	1	D>G(340)	1
N	v198	1	P>S(326)	1
N	v199	1	I>V(320)	1
N	v200	1	A>S(311);R>L(319)	2
N	v201	1	P>S(302)	1
N	v202	1	A>S(252)	1
N	v203	1	K>R(249)	1
N	v204	1	K>T(237)	1
N	v205	1	G>V(236)	1
N	v206	1	S>T(232)	1
N	v207	1	A>T(220)	1
N	v208	1	A>V(218)	1
N	v209	1	G>V(215)	1
N	v210	1	A>S(211)	1
N	v211	1	R>T(209);G>C(238)	2
N	v212	1	R>T(209)	1
N	v213	1	A>G(208);G>C(238);T>A(247)	3
N	v214	1	A>G(208);D>Y(348)	2
N	v215	1	P>S(207)	1
N	v216	1	P>T(199)	1
N	v217	1	S>T(180);R>K(203);G>R(204);T>I(282)	4
N	v218	1	P>Q(168)	1
N	v219	1	Q>R(163)	1
N	v220	1	I>T(157);R>K(203)	2
N	v221	1	N>Y(154)	1
N	v222	1	A>S(152);S>L(194)	2
N	v223	1	P>S(151)	1
N	v224	1	H>Y(145)	1
N	v225	1	D>H(144);R>K(203);G>R(204)	3
N	v226	1	D>Y(144);S>L(194)	2
N	v227	1	D>Y(144);R>K(203);G>R(204)	3
N	v228	1	N>T(140)	1
N	v229	1	A>V(134)	1
N	v230	1	D>H(128)	1
N	v231	1	A>T(125)	1
N	v232	1	G>R(120);S>L(194)	2
N	v233	1	A>S(119)	1
N	v234	1	A>V(119);S>L(327)	2
N	v235	1	G>S(97);S>L(194)	2
N	v236	1	A>S(90)	1
N	v237	1	Q>R(83);R>K(203);G>R(204)	3
N	v238	1	D>Y(81)	1
N	v239	1	S>T(79)	1
N	v240	1	D>N(63);N>S(196);D>Y(371)	3
N	v241	1	G>R(60)	1
N	v242	1	P>S(46)	1
N	v243	1	Q>R(43);S>Y(183)	2
N	v244	1	A>S(35);K>N(342)	2
N	v245	1	A>T(35)	1
N	v246	1	A>V(35);T>R(325)	2
N	v247	1	D>N(22);S>L(194)	2
N	v248	1	D>Y(22);S>L(194)	2
N	v249	1	G>V(18);T>I(205)	2
N	v250	1	N>S(11);R>K(203);G>R(204)	3
N	v251	1	P>T(6);P>L(13)	2
N	v252	1	P>T(6)	1
N	v253	1	P>T(6);S>T(23)	2
N	v254	1	D>Y(3);R>K(203);G>R(204)	3
N	v255	1	D>Y(3)	1
M	v2	30	T>M(175)	1
M	v3	21	D>G(3)	1
M	v4	18	V>F(70)	1
M	v5	18	K>R(15)	1
M	v6	13	R>H(146)	1
M	v7	12	V>I(70)	1
M	v8	11	D>Y(209)	1
M	v9	10	H>Y(125)	1
M	v10	6	L>V(129)	1
M	v11	6	A>S(2)	1
M	v12	4	V>I(170)	1
M	v13	4	S>I(214)	1
M	v14	3	M>I(109)	1
M	v15	3	L>F(145)	1
M	v16	3	H>Y(155)	1
M	v17	3	C>F(64)	1
M	v18	2	S>F(4)	1
M	v19	2	A>S(85)	1
M	v20	2	D>Y(3)	1
M	v21	2	A>V(2)	1
M	v22	1	V>A(10)	1
M	v23	1	L>F(13)	1
M	v24	1	V>L(23)	1
M	v25	1	L>F(29)	1
M	v26	1	L>F(34)	1
M	v27	1	L>F(46)	1
M	v28	1	W>L(75)	1
M	v29	1	L>F(87)	1
M	v30	1	R>L(107)	1
M	v31	1	P>L(123)	1
M	v32	1	L>F(124)	1
M	v33	1	L>I(138)	1
M	v34	1	R>L(158)	1
M	v35	1	Y>C(199)	1
M	v36	1	T>I(208)	1
M	v37	1	D>N(190)	1
M	v38	1	A>V(142)	1
M	v39	1	P>S(132)	1
M	v40	1	A>S(98)	1
M	v41	1	G>S(89)	1
M	v42	1	A>D(85)	1
M	v43	1	A>S(69)	1
M	v44	1	A>V(69)	1
M	v45	1	A>T(63)	1
M	v46	1	L>S(62)	1
M	v47	1	I>T(48)	1
M	v48	1	A>S(38)	1
M	v49	1	C>F(33)	1
M	v50	1	G>V(25)	1
M	v51	1	E>G(11)	1
E	v2	9	P>L(71)	1
E	v3	5	S>F(68)	1
E	v4	3	L>F(73)	1
E	v5	2	S>F(55)	1
E	v6	2	P>S(71)	1
E	v7	2	F>L(26)	1
E	v8	1	V>I(5)	1
E	v9	1	E>D(8)	1
E	v10	1	T>I(9)	1
E	v11	1	L>F(19)	1
E	v12	1	V>F(62)	1
E	v13	1	S>C(68)	1
E	v14	1	V>F(75)	1
E	v15	1	D>Y(72)	1
E	v16	1	C>S(43)	1
E	v17	1	A>S(41)	1
E	v18	1	A>V(41)	1
E	v19	1	L>M(39)	1
E	v20	1	L>R(37)	1
E	v21	1	A>V(36)	1
E	v22	1	F>L(20)	1
E	v23	1	E>K(8)	1
E	v24	1	E>Q(7)	1

## Sheet: Sheet2
Protein	Country	Variant	Sample
E	AUS	v1	1346
E	AUS	v4	3
E	AUS	v3	2
E	AUS	v16	1
E	BGD	v1	144
E	BGD	v9	1
E	BGD	v22	1
E	BHR	v1	8
E	BRA	v1	5
E	CHL	v1	11
E	CHN	v1	71
E	CHN	v13	1
E	CHN	v15	1
E	COL	v1	2
E	CZE	v1	23
E	DEU	v1	77
E	EGY	v1	72
E	ESP	v1	32
E	FRA	v1	81
E	GEO	v1	1
E	GRC	v1	97
E	GRC	v19	1
E	Guangzhou	v1	1
E	GUM	v1	3
E	HKG	v1	25
E	IND	v1	342
E	IND	v12	1
E	IND	v14	1
E	IRN	v1	5
E	ISR	v1	2
E	ITA	v1	13
E	JAM	v1	6
E	KAZ	v1	4
E	KEN	v1	1
E	KEN	v3	1
E	KOR	v1	5
E	LKA	v1	4
E	MAR	v1	7
E	Morocc0	v1	1
E	MYS	v1	4
E	NGA	v1	1
E	NLD	v1	3
E	NPL	v1	1
E	NZL	v1	1
E	PAK	v1	3
E	PER	v1	1
E	POL	v1	23
E	RUS	v1	8
E	SAU	v1	28
E	SAU	v11	1
E	SRB	v1	8
E	SWE	v1	1
E	THA	v1	23
E	TLS	v1	26
E	TUN	v1	8
E	TUR	v1	7
E	TWN	v1	30
E	URY	v1	1
E	USA	v1	6449
E	USA	v2	9
E	USA	v3	2
E	USA	v5	2
E	USA	v6	2
E	USA	v7	2
E	USA	v8	1
E	USA	v10	1
E	USA	v17	1
E	USA	v18	1
E	USA	v20	1
E	USA	v21	1
E	USA	v23	1
E	USA	v24	1
E	VNM	v1	2
E	ZAF	v1	1
M	AUS	v1	1265
M	AUS	v3	13
M	AUS	v6	12
M	AUS	v2	8
M	AUS	v12	4
M	AUS	v13	4
M	AUS	v4	1
M	AUS	v27	1
M	AUS	v28	1
M	AUS	v46	1
M	AUS	v49	1
M	BGD	v1	136
M	BGD	v9	6
M	BGD	v8	1
M	BGD	v18	1
M	BGD	v21	1
M	BGD	v22	1
M	BHR	v1	8
M	BRA	v1	5
M	CHL	v1	11
M	CHN	v1	72
M	CHN	v11	1
M	COL	v1	2
M	CZE	v1	19
M	CZE	v2	4
M	DEU	v1	76
M	DEU	v2	1
M	EGY	v1	70
M	ESP	v1	30
M	ESP	v45	1
M	FRA	v1	78
M	FRA	v2	1
M	FRA	v9	1
M	FRA	v44	1
M	GEO	v1	1
M	GRC	v1	96
M	Guangzhou	v1	1
M	GUM	v1	3
M	HKG	v1	24
M	HKG	v2	1
M	IND	v1	353
M	IND	v9	1
M	IND	v25	1
M	IND	v38	1
M	IND	v43	1
M	IRN	v1	4
M	ISR	v1	2
M	ITA	v1	10
M	ITA	v3	2
M	ITA	v2	1
M	JAM	v1	6
M	KAZ	v1	3
M	KAZ	v3	1
M	KEN	v1	1
M	KEN	v47	1
M	KOR	v1	5
M	LKA	v1	3
M	LKA	v21	1
M	MAR	v1	6
M	MAR	v23	1
M	Morocc0	v1	1
M	MYS	v1	2
M	NGA	v1	1
M	NLD	v1	2
M	NLD	v2	1
M	NPL	v1	1
M	NZL	v1	1
M	PAK	v1	3
M	PER	v1	1
M	POL	v1	23
M	RUS	v1	7
M	RUS	v2	1
M	SAU	v1	28
M	SAU	v18	1
M	SRB	v1	7
M	SRB	v20	1
M	SWE	v1	1
M	THA	v1	22
M	THA	v3	1
M	TLS	v1	27
M	TUN	v1	8
M	TUR	v1	7
M	TWN	v1	30
M	URY	v1	1
M	USA	v1	6185
M	USA	v5	18
M	USA	v4	17
M	USA	v2	12
M	USA	v7	12
M	USA	v8	10
M	USA	v10	6
M	USA	v11	5
M	USA	v3	4
M	USA	v14	3
M	USA	v15	3
M	USA	v16	3
M	USA	v17	3
M	USA	v9	2
M	USA	v19	2
M	USA	v6	1
M	USA	v20	1
M	USA	v24	1
M	USA	v26	1
M	USA	v29	1
M	USA	v30	1
M	USA	v31	1
M	USA	v32	1
M	USA	v33	1
M	USA	v34	1
M	USA	v35	1
M	USA	v36	1
M	USA	v37	1
M	USA	v39	1
M	USA	v40	1
M	USA	v41	1
M	USA	v42	1
M	USA	v48	1
M	USA	v50	1
M	USA	v51	1
M	VNM	v1	2
M	ZAF	v1	1
N	AUS	v1	537
N	AUS	v2	191
N	AUS	v10	26
N	AUS	v4	20
N	AUS	v17	13
N	AUS	v3	10
N	AUS	v21	6
N	AUS	v11	4
N	AUS	v36	4
N	AUS	v46	3
N	AUS	v52	3
N	AUS	v14	2
N	AUS	v25	2
N	AUS	v33	2
N	AUS	v48	2
N	AUS	v70	2
N	AUS	v6	1
N	AUS	v9	1
N	AUS	v12	1
N	AUS	v16	1
N	AUS	v26	1
N	AUS	v27	1
N	AUS	v29	1
N	AUS	v30	1
N	AUS	v54	1
N	AUS	v86	1
N	AUS	v99	1
N	AUS	v114	1
N	AUS	v115	1
N	AUS	v121	1
N	AUS	v124	1
N	AUS	v144	1
N	AUS	v150	1
N	AUS	v163	1
N	AUS	v172	1
N	AUS	v176	1
N	AUS	v192	1
N	AUS	v198	1
N	AUS	v200	1
N	AUS	v216	1
N	AUS	v220	1
N	AUS	v241	1
N	BGD	v2	122
N	BGD	v1	4
N	BGD	v20	4
N	BGD	v39	4
N	BGD	v3	3
N	BGD	v123	1
N	BGD	v135	1
N	BGD	v138	1
N	BGD	v149	1
N	BGD	v217	1
N	BGD	v222	1
N	BGD	v237	1
N	BGD	v250	1
N	BGD	v254	1
N	BHR	v1	5
N	BHR	v2	3
N	BRA	v1	3
N	BRA	v2	1
N	BRA	v14	1
N	CHL	v1	6
N	CHL	v2	1
N	CHL	v12	1
N	CHL	v14	1
N	CHN	v1	69
N	CHN	v2	1
N	CHN	v11	1
N	CHN	v16	1
N	CHN	v83	1
N	COL	v1	1
N	COL	v68	1
N	CZE	v2	17
N	CZE	v1	6
N	DEU	v1	59
N	DEU	v2	8
N	DEU	v43	3
N	DEU	v3	1
N	DEU	v33	1
N	DEU	v147	1
N	EGY	v1	31
N	EGY	v5	1
N	EGY	v6	1
N	EGY	v145	1
N	EGY	v168	1
N	EGY	v246	1
N	ESP	v1	14
N	ESP	v12	11
N	ESP	v2	3
N	FRA	v1	75
N	FRA	v2	4
N	FRA	v4	1
N	FRA	v69	1
N	GEO	v1	1
N	GRC	v2	54
N	GRC	v1	32
N	GRC	v34	5
N	GRC	v12	2
N	GRC	v29	1
N	GRC	v47	1
N	GRC	v51	1
N	GRC	v63	1
N	GRC	v148	1
N	Guangzhou	v1	1
N	GUM	v4	2
N	GUM	v101	1
N	HKG	v1	20
N	HKG	v2	2
N	HKG	v3	2
N	HKG	v167	1
N	IND	v1	157
N	IND	v3	118
N	IND	v4	20
N	IND	v6	12
N	IND	v2	10
N	IND	v11	4
N	IND	v55	3
N	IND	v24	2
N	IND	v38	2
N	IND	v60	2
N	IND	v47	1
N	IND	v77	1
N	IND	v83	1
N	IND	v94	1
N	IND	v102	1
N	IND	v103	1
N	IND	v119	1
N	IND	v131	1
N	IND	v133	1
N	IND	v134	1
N	IND	v136	1
N	IND	v140	1
N	IND	v141	1
N	IND	v142	1
N	IND	v162	1
N	IND	v201	1
N	IND	v226	1
N	IND	v229	1
N	IND	v232	1
N	IND	v235	1
N	IND	v247	1
N	IND	v248	1
N	IND	v251	1
N	IND	v252	1
N	IRN	v33	2
N	IRN	v1	1
N	ISR	v1	1
N	ISR	v2	1
N	ITA	v1	9
N	ITA	v2	4
N	JAM	v1	5
N	JAM	v4	1
N	KAZ	v1	1
N	KAZ	v2	1
N	KAZ	v12	1
N	KAZ	v44	1
N	KEN	v1	1
N	KEN	v143	1
N	KOR	v4	3
N	KOR	v1	1
N	KOR	v180	1
N	LKA	v1	2
N	LKA	v2	1
N	LKA	v189	1
N	MAR	v1	5
N	MAR	v2	1
N	MAR	v195	1
N	Morocc0	v1	1
N	MYS	v4	3
N	NGA	v2	1
N	NLD	v1	2
N	NLD	v2	1
N	NPL	v1	1
N	NZL	v1	1
N	PAK	v1	3
N	PER	v2	1
N	POL	v2	15
N	POL	v1	4
N	POL	v79	2
N	RUS	v1	4
N	RUS	v2	4
N	SAU	v1	16
N	SAU	v2	7
N	SAU	v3	3
N	SAU	v6	1
N	SAU	v40	1
N	SAU	v137	1
N	SRB	v2	4
N	SRB	v1	2
N	SRB	v45	1
N	SRB	v53	1
N	SWE	v1	1
N	THA	v1	21
N	THA	v234	1
N	TLS	v4	10
N	TLS	v11	1
N	TUN	v1	3
N	TUN	v6	2
N	TUN	v25	1
N	TUN	v107	1
N	TUN	v186	1
N	TUR	v1	3
N	TUR	v2	2
N	TWN	v1	18
N	TWN	v2	4
N	TWN	v4	2
N	TWN	v25	2
N	TWN	v3	1
N	TWN	v7	1
N	TWN	v218	1
N	TWN	v227	1
N	URY	v1	1
N	USA	v1	5309
N	USA	v2	302
N	USA	v5	74
N	USA	v7	43
N	USA	v8	34
N	USA	v9	32
N	USA	v6	30
N	USA	v11	17
N	USA	v13	17
N	USA	v15	16
N	USA	v3	15
N	USA	v4	15
N	USA	v14	12
N	USA	v16	11
N	USA	v18	11
N	USA	v19	10
N	USA	v22	10
N	USA	v23	9
N	USA	v12	6
N	USA	v20	6
N	USA	v24	6
N	USA	v26	6
N	USA	v27	6
N	USA	v28	6
N	USA	v31	6
N	USA	v30	5
N	USA	v32	5
N	USA	v35	5
N	USA	v21	4
N	USA	v29	4
N	USA	v37	4
N	USA	v41	4
N	USA	v42	4
N	USA	v40	3
N	USA	v49	3
N	USA	v50	3
N	USA	v56	3
N	USA	v57	3
N	USA	v58	3
N	USA	v10	2
N	USA	v25	2
N	USA	v38	2
N	USA	v44	2
N	USA	v45	2
N	USA	v51	2
N	USA	v53	2
N	USA	v54	2
N	USA	v59	2
N	USA	v61	2
N	USA	v62	2
N	USA	v64	2
N	USA	v65	2
N	USA	v66	2
N	USA	v67	2
N	USA	v71	2
N	USA	v72	2
N	USA	v73	2
N	USA	v74	2
N	USA	v75	2
N	USA	v76	2
N	USA	v78	2
N	USA	v80	2
N	USA	v81	2
N	USA	v82	2
N	USA	v84	2
N	USA	v85	2
N	USA	v87	2
N	USA	v88	2
N	USA	v89	2
N	USA	v90	2
N	USA	v91	2
N	USA	v92	2
N	USA	v93	2
N	USA	v95	2
N	USA	v96	2
N	USA	v97	2
N	USA	v43	1
N	USA	v47	1
N	USA	v48	1
N	USA	v63	1
N	USA	v68	1
N	USA	v69	1
N	USA	v77	1
N	USA	v86	1
N	USA	v94	1
N	USA	v98	1
N	USA	v100	1
N	USA	v104	1
N	USA	v105	1
N	USA	v106	1
N	USA	v108	1
N	USA	v109	1
N	USA	v110	1
N	USA	v111	1
N	USA	v112	1
N	USA	v113	1
N	USA	v116	1
N	USA	v117	1
N	USA	v118	1
N	USA	v120	1
N	USA	v122	1
N	USA	v125	1
N	USA	v126	1
N	USA	v127	1
N	USA	v128	1
N	USA	v129	1
N	USA	v130	1
N	USA	v132	1
N	USA	v139	1
N	USA	v146	1
N	USA	v151	1
N	USA	v152	1
N	USA	v153	1
N	USA	v154	1
N	USA	v155	1
N	USA	v156	1
N	USA	v157	1
N	USA	v158	1
N	USA	v159	1
N	USA	v160	1
N	USA	v161	1
N	USA	v164	1
N	USA	v165	1
N	USA	v166	1
N	USA	v169	1
N	USA	v170	1
N	USA	v171	1
N	USA	v173	1
N	USA	v174	1
N	USA	v175	1
N	USA	v177	1
N	USA	v178	1
N	USA	v179	1
N	USA	v181	1
N	USA	v182	1
N	USA	v183	1
N	USA	v184	1
N	USA	v185	1
N	USA	v187	1
N	USA	v188	1
N	USA	v190	1
N	USA	v191	1
N	USA	v193	1
N	USA	v194	1
N	USA	v196	1
N	USA	v197	1
N	USA	v199	1
N	USA	v202	1
N	USA	v203	1
N	USA	v204	1
N	USA	v205	1
N	USA	v206	1
N	USA	v207	1
N	USA	v208	1
N	USA	v209	1
N	USA	v210	1
N	USA	v211	1
N	USA	v212	1
N	USA	v213	1
N	USA	v214	1
N	USA	v215	1
N	USA	v219	1
N	USA	v221	1
N	USA	v223	1
N	USA	v224	1
N	USA	v225	1
N	USA	v228	1
N	USA	v230	1
N	USA	v231	1
N	USA	v233	1
N	USA	v236	1
N	USA	v238	1
N	USA	v239	1
N	USA	v240	1
N	USA	v242	1
N	USA	v243	1
N	USA	v244	1
N	USA	v245	1
N	USA	v249	1
N	USA	v253	1
N	USA	v255	1
N	VNM	v1	2
N	ZAF	v1	1
S	AUS	v2	157
S	AUS	v1	116
S	AUS	v5	37
S	AUS	v14	13
S	AUS	v22	7
S	AUS	v37	5
S	AUS	v40	4
S	AUS	v46	4
S	AUS	v54	3
S	AUS	v33	2
S	AUS	v34	2
S	AUS	v68	2
S	AUS	v98	2
S	AUS	v4	1
S	AUS	v10	1
S	AUS	v12	1
S	AUS	v13	1
S	AUS	v16	1
S	AUS	v35	1
S	AUS	v84	1
S	AUS	v85	1
S	AUS	v99	1
S	AUS	v126	1
S	AUS	v133	1
S	AUS	v134	1
S	AUS	v137	1
S	AUS	v144	1
S	AUS	v173	1
S	AUS	v177	1
S	AUS	v198	1
S	AUS	v202	1
S	AUS	v209	1
S	AUS	v218	1
S	AUS	v224	1
S	AUS	v231	1
S	AUS	v276	1
S	AUS	v285	1
S	AUS	v305	1
S	AUS	v317	1
S	AUS	v338	1
S	BGD	v2	120
S	BGD	v1	2
S	BGD	v33	2
S	BGD	v64	2
S	BGD	v70	2
S	BGD	v4	1
S	BGD	v18	1
S	BGD	v34	1
S	BGD	v45	1
S	BGD	v93	1
S	BGD	v95	1
S	BGD	v115	1
S	BGD	v152	1
S	BGD	v174	1
S	BGD	v274	1
S	BGD	v277	1
S	BGD	v300	1
S	BGD	v309	1
S	BGD	v328	1
S	BGD	v337	1
S	BGD	v347	1
S	BGD	v350	1
S	BHR	v2	6
S	BHR	v79	1
S	BHR	v258	1
S	BRA	v2	2
S	BRA	v1	1
S	BRA	v72	1
S	BRA	v261	1
S	CHL	v2	9
S	CHL	v62	1
S	CHN	v1	65
S	CHN	v2	3
S	CHN	v28	2
S	CHN	v72	1
S	CHN	v132	1
S	CHN	v136	1
S	CHN	v155	1
S	CHN	v165	1
S	CHN	v180	1
S	CHN	v210	1
S	CHN	v230	1
S	CHN	v235	1
S	CHN	v311	1
S	CHN	v318	1
S	CHN	v324	1
S	CHN	v348	1
S	COL	v1	1
S	COL	v2	1
S	CZE	v2	20
S	DEU	v2	40
S	DEU	v1	9
S	DEU	v48	1
S	DEU	v111	1
S	DEU	v175	1
S	DEU	v176	1
S	DEU	v312	1
S	EGY	v2	41
S	EGY	v13	6
S	EGY	v81	2
S	EGY	v1	1
S	EGY	v121	1
S	EGY	v239	1
S	EGY	v310	1
S	ESP	v1	11
S	ESP	v2	11
S	ESP	v166	1
S	FRA	v2	1
S	France	v2	50
S	France	v1	11
S	France	v23	5
S	France	v4	2
S	France	v88	2
S	France	v7	1
S	France	v15	1
S	France	v97	1
S	France	v156	1
S	France	v161	1
S	France	v171	1
S	France	v193	1
S	France	v201	1
S	France	v207	1
S	France	v319	1
S	GEO	v2	1
S	GRC	v2	68
S	GRC	v1	18
S	GRC	v24	3
S	GRC	v62	2
S	GRC	v162	1
S	GRC	v195	1
S	GRC	v213	1
S	GRC	v251	1
S	GRC	v275	1
S	GRC	v280	1
S	GRC	v290	1
S	Guangzhou	v1	1
S	GUM	v1	3
S	HKG	v1	14
S	HKG	v63	3
S	HKG	v2	1
S	HKG	v128	1
S	HKG	v129	1
S	HKG	v191	1
S	IND	v2	189
S	IND	v3	51
S	IND	v1	23
S	IND	v15	9
S	IND	v16	9
S	IND	v19	8
S	IND	v13	6
S	IND	v60	2
S	IND	v66	2
S	IND	v76	2
S	IND	v77	2
S	IND	v35	1
S	IND	v44	1
S	IND	v79	1
S	IND	v84	1
S	IND	v93	1
S	IND	v117	1
S	IND	v118	1
S	IND	v122	1
S	IND	v130	1
S	IND	v139	1
S	IND	v140	1
S	IND	v141	1
S	IND	v142	1
S	IND	v145	1
S	IND	v157	1
S	IND	v158	1
S	IND	v159	1
S	IND	v204	1
S	IND	v205	1
S	IND	v206	1
S	IND	v208	1
S	IND	v228	1
S	IND	v253	1
S	IND	v262	1
S	IND	v265	1
S	IND	v268	1
S	IND	v272	1
S	IND	v281	1
S	IND	v287	1
S	IND	v289	1
S	IND	v292	1
S	IND	v293	1
S	IND	v295	1
S	IND	v308	1
S	IND	v326	1
S	IND	v327	1
S	IND	v344	1
S	IND	v355	1
S	IRN	v1	2
S	IRN	v48	2
S	ISR	v1	1
S	ISR	v2	1
S	ITA	v2	9
S	ITA	v1	2
S	ITA	v4	1
S	ITA	v264	1
S	JAM	v1	4
S	JAM	v2	2
S	KAZ	v1	2
S	KAZ	v2	2
S	KEN	v1	1
S	KOR	v1	4
S	KOR	v135	1
S	LKA	v1	2
S	LKA	v2	2
S	MAR	v2	7
S	Morocc0	v2	1
S	MYS	v1	2
S	NGA	v2	1
S	NLD	v2	2
S	NPL	v1	1
S	NZL	v2	1
S	PAK	v1	3
S	PER	v2	1
S	POL	v2	19
S	POL	v246	1
S	RUS	v2	7
S	RUS	v1	1
S	SAU	v2	24
S	SAU	v1	1
S	SAU	v237	1
S	SAU	v244	1
S	SAU	v297	1
S	SRB	v2	10
S	SRB	v34	1
S	SWE	v212	1
S	THA	v6	37
S	THA	v1	12
S	THA	v2	9
S	THA	v3	1
S	THA	v214	1
S	THA	v254	1
S	TLS	v1	4
S	TUN	v2	3
S	TUN	v1	2
S	TUN	v71	1
S	TUN	v181	1
S	TUN	v325	1
S	TUR	v2	5
S	TUR	v163	1
S	TUR	v211	1
S	TWN	v2	12
S	TWN	v1	8
S	TWN	v26	6
S	TWN	v234	1
S	TWN	v248	1
S	TWN	v351	1
S	URY	v1	1
S	USA	v2	3369
S	USA	v1	1561
S	USA	v4	34
S	USA	v7	23
S	USA	v8	22
S	USA	v9	21
S	USA	v10	16
S	USA	v11	16
S	USA	v12	13
S	USA	v17	10
S	USA	v20	8
S	USA	v21	8
S	USA	v18	7
S	USA	v25	7
S	USA	v27	6
S	USA	v29	6
S	USA	v30	6
S	USA	v31	6
S	USA	v32	6
S	USA	v36	5
S	USA	v38	5
S	USA	v24	4
S	USA	v28	4
S	USA	v39	4
S	USA	v41	4
S	USA	v42	4
S	USA	v43	4
S	USA	v35	3
S	USA	v44	3
S	USA	v45	3
S	USA	v47	3
S	USA	v49	3
S	USA	v50	3
S	USA	v51	3
S	USA	v52	3
S	USA	v53	3
S	USA	v55	3
S	USA	v56	3
S	USA	v57	3
S	USA	v58	3
S	USA	v59	3
S	USA	v61	3
S	USA	v23	2
S	USA	v33	2
S	USA	v34	2
S	USA	v65	2
S	USA	v67	2
S	USA	v69	2
S	USA	v73	2
S	USA	v74	2
S	USA	v75	2
S	USA	v78	2
S	USA	v80	2
S	USA	v82	2
S	USA	v83	2
S	USA	v86	2
S	USA	v87	2
S	USA	v89	2
S	USA	v90	2
S	USA	v91	2
S	USA	v92	2
S	USA	v94	2
S	USA	v96	2
S	USA	v100	2
S	USA	v101	2
S	USA	v102	2
S	USA	v103	2
S	USA	v104	2
S	USA	v105	2
S	USA	v106	2
S	USA	v107	2
S	USA	v108	2
S	USA	v109	2
S	USA	v110	2
S	USA	v112	2
S	USA	v113	2
S	USA	v114	2
S	USA	v3	1
S	USA	v15	1
S	USA	v16	1
S	USA	v60	1
S	USA	v71	1
S	USA	v85	1
S	USA	v95	1
S	USA	v97	1
S	USA	v99	1
S	USA	v111	1
S	USA	v116	1
S	USA	v119	1
S	USA	v120	1
S	USA	v123	1
S	USA	v124	1
S	USA	v125	1
S	USA	v127	1
S	USA	v131	1
S	USA	v138	1
S	USA	v143	1
S	USA	v146	1
S	USA	v147	1
S	USA	v148	1
S	USA	v149	1
S	USA	v150	1
S	USA	v151	1
S	USA	v153	1
S	USA	v154	1
S	USA	v160	1
S	USA	v164	1
S	USA	v167	1
S	USA	v168	1
S	USA	v169	1
S	USA	v170	1
S	USA	v172	1
S	USA	v178	1
S	USA	v179	1
S	USA	v182	1
S	USA	v183	1
S	USA	v184	1
S	USA	v185	1
S	USA	v186	1
S	USA	v187	1
S	USA	v188	1
S	USA	v189	1
S	USA	v190	1
S	USA	v192	1
S	USA	v194	1
S	USA	v196	1
S	USA	v197	1
S	USA	v199	1
S	USA	v200	1
S	USA	v203	1
S	USA	v215	1
S	USA	v216	1
S	USA	v217	1
S	USA	v219	1
S	USA	v220	1
S	USA	v221	1
S	USA	v222	1
S	USA	v223	1
S	USA	v225	1
S	USA	v226	1
S	USA	v227	1
S	USA	v229	1
S	USA	v232	1
S	USA	v233	1
S	USA	v236	1
S	USA	v238	1
S	USA	v240	1
S	USA	v241	1
S	USA	v242	1
S	USA	v243	1
S	USA	v245	1
S	USA	v247	1
S	USA	v249	1
S	USA	v250	1
S	USA	v252	1
S	USA	v255	1
S	USA	v256	1
S	USA	v257	1
S	USA	v259	1
S	USA	v260	1
S	USA	v263	1
S	USA	v266	1
S	USA	v267	1
S	USA	v269	1
S	USA	v270	1
S	USA	v271	1
S	USA	v273	1
S	USA	v278	1
S	USA	v279	1
S	USA	v282	1
S	USA	v283	1
S	USA	v284	1
S	USA	v286	1
S	USA	v288	1
S	USA	v291	1
S	USA	v294	1
S	USA	v296	1
S	USA	v298	1
S	USA	v299	1
S	USA	v301	1
S	USA	v302	1
S	USA	v303	1
S	USA	v304	1
S	USA	v306	1
S	USA	v307	1
S	USA	v313	1
S	USA	v314	1
S	USA	v315	1
S	USA	v316	1
S	USA	v320	1
S	USA	v321	1
S	USA	v322	1
S	USA	v323	1
S	USA	v329	1
S	USA	v330	1
S	USA	v331	1
S	USA	v332	1
S	USA	v333	1
S	USA	v334	1
S	USA	v335	1
S	USA	v336	1
S	USA	v339	1
S	USA	v340	1
S	USA	v341	1
S	USA	v342	1
S	USA	v343	1
S	USA	v345	1
S	USA	v346	1
S	USA	v349	1
S	USA	v352	1
S	USA	v353	1
S	USA	v354	1
S	VNM	v1	2
