# Supplementary material for: A Study on Non-Synonymous Mutational Patterns in Structural Proteins of SARS-COV-2
Source: Preprints.org preprint supplement (doi:10.20944/preprints202008.0621.v2), 2021-03-04
Supplement: Supplementary file 5 [file Supplementary-C.xlsx]

## Sheet: Sheet1
A study on non-synonymous mutational patterns in structural proteins of SARS-CoV-2 Jayanta Kumar Das, Swarup Roy
Protein	Substitutions	Country	Sample frequency
E	P>L(71)	USA	6449
E	P>L(71)	AUS	1346
E	P>L(71)	IND	342
E	P>L(71)	BGD	144
E	P>L(71)	GRC	97
E	P>L(71)	FRA	81
E	P>L(71)	DEU	77
E	P>L(71)	EGY	72
E	P>L(71)	CHN	71
E	P>L(71)	ESP	32
E	P>L(71)	TWN	30
E	P>L(71)	SAU	28
E	P>L(71)	TLS	26
E	P>L(71)	HKG	25
E	P>L(71)	CZE	23
E	P>L(71)	POL	23
E	P>L(71)	THA	23
E	P>L(71)	ITA	13
E	P>L(71)	CHL	11
E	P>L(71)	BHR	8
E	P>L(71)	RUS	8
E	P>L(71)	SRB	8
E	P>L(71)	TUN	8
E	P>L(71)	MAR	7
E	P>L(71)	TUR	7
E	P>L(71)	JAM	6
E	P>L(71)	BRA	5
E	P>L(71)	IRN	5
E	P>L(71)	KOR	5
E	P>L(71)	KAZ	4
E	P>L(71)	LKA	4
E	P>L(71)	MYS	4
E	P>L(71)	GUM	3
E	P>L(71)	NLD	3
E	P>L(71)	PAK	3
E	P>L(71)	COL	2
E	P>L(71)	ISR	2
E	P>L(71)	VNM	2
E	P>L(71)	GEO	1
E	P>L(71)	Guangzhou	1
E	P>L(71)	KEN	1
E	P>L(71)	Morocc0	1
E	P>L(71)	NGA	1
E	P>L(71)	NPL	1
E	P>L(71)	NZL	1
E	P>L(71)	PER	1
E	P>L(71)	SWE	1
E	P>L(71)	URY	1
E	P>L(71)	ZAF	1
E	S>F(68)	USA	9
E	L>F(73)	AUS	2
E	L>F(73)	USA	2
E	L>F(73)	KEN	1
E	S>F(55)	AUS	3
E	P>S(71)	USA	2
E	F>L(26)	USA	2
E	V>I(5)	USA	2
E	E>D(8)	USA	1
E	T>I(9)	BGD	1
E	L>F(19)	USA	1
E	V>F(62)	SAU	1
E	S>C(68)	IND	1
E	V>F(75)	CHN	1
E	D>Y(72)	IND	1
E	C>S(43)	CHN	1
E	A>S(41)	AUS	1
E	A>V(41)	USA	1
E	L>M(39)	USA	1
E	L>R(37)	GRC	1
E	A>V(36)	USA	1
E	F>L(20)	USA	1
E	E>K(8)	BGD	1
M	T>M(175)	USA	6185
M	T>M(175)	AUS	1265
M	T>M(175)	IND	353
M	T>M(175)	BGD	136
M	T>M(175)	GRC	96
M	T>M(175)	FRA	78
M	T>M(175)	DEU	76
M	T>M(175)	CHN	72
M	T>M(175)	EGY	70
M	T>M(175)	ESP	30
M	T>M(175)	TWN	30
M	T>M(175)	SAU	28
M	T>M(175)	TLS	27
M	T>M(175)	HKG	24
M	T>M(175)	POL	23
M	T>M(175)	THA	22
M	T>M(175)	CZE	19
M	T>M(175)	CHL	11
M	T>M(175)	ITA	10
M	T>M(175)	BHR	8
M	T>M(175)	TUN	8
M	T>M(175)	RUS	7
M	T>M(175)	SRB	7
M	T>M(175)	TUR	7
M	T>M(175)	JAM	6
M	T>M(175)	MAR	6
M	T>M(175)	BRA	5
M	T>M(175)	KOR	5
M	T>M(175)	IRN	4
M	T>M(175)	GUM	3
M	T>M(175)	KAZ	3
M	T>M(175)	LKA	3
M	T>M(175)	PAK	3
M	T>M(175)	COL	2
M	T>M(175)	ISR	2
M	T>M(175)	MYS	2
M	T>M(175)	NLD	2
M	T>M(175)	VNM	2
M	T>M(175)	GEO	1
M	T>M(175)	Guangzhou	1
M	T>M(175)	KEN	1
M	T>M(175)	Morocc0	1
M	T>M(175)	NGA	1
M	T>M(175)	NPL	1
M	T>M(175)	NZL	1
M	T>M(175)	PER	1
M	T>M(175)	SWE	1
M	T>M(175)	URY	1
M	T>M(175)	ZAF	1
M	D>G(3)	USA	12
M	D>G(3)	AUS	8
M	D>G(3)	CZE	4
M	D>G(3)	DEU	1
M	D>G(3)	FRA	1
M	D>G(3)	HKG	1
M	D>G(3)	ITA	1
M	D>G(3)	NLD	1
M	D>G(3)	RUS	1
M	V>F(70)	AUS	13
M	V>F(70)	USA	4
M	V>F(70)	ITA	2
M	V>F(70)	KAZ	1
M	V>F(70)	THA	1
M	K>R(15)	USA	17
M	K>R(15)	AUS	1
M	R>H(146)	USA	18
M	V>I(70)	AUS	12
M	V>I(70)	USA	1
M	D>Y(209)	USA	12
M	H>Y(125)	USA	10
M	H>Y(125)	BGD	1
M	L>V(129)	BGD	6
M	L>V(129)	USA	2
M	L>V(129)	FRA	1
M	L>V(129)	IND	1
M	A>S(2)	USA	6
M	V>I(170)	USA	5
M	V>I(170)	CHN	1
M	S>I(214)	AUS	4
M	M>I(109)	AUS	4
M	L>F(145)	USA	3
M	H>Y(155)	USA	3
M	C>F(64)	USA	3
M	S>F(4)	USA	3
M	A>S(85)	BGD	1
M	A>S(85)	SAU	1
M	D>Y(3)	USA	2
M	A>V(2)	SRB	1
M	A>V(2)	USA	1
M	V>A(10)	BGD	1
M	V>A(10)	LKA	1
M	L>F(13)	BGD	1
M	V>L(23)	MAR	1
M	L>F(29)	USA	1
M	L>F(34)	IND	1
M	L>F(46)	USA	1
M	W>L(75)	AUS	1
M	L>F(87)	AUS	1
M	R>L(107)	USA	1
M	P>L(123)	USA	1
M	L>F(124)	USA	1
M	L>I(138)	USA	1
M	R>L(158)	USA	1
M	Y>C(199)	USA	1
M	T>I(208)	USA	1
M	D>N(190)	USA	1
M	A>V(142)	USA	1
M	P>S(132)	IND	1
M	A>S(98)	USA	1
M	G>S(89)	USA	1
M	A>D(85)	USA	1
M	A>S(69)	USA	1
M	A>V(69)	IND	1
M	A>T(63)	FRA	1
M	L>S(62)	ESP	1
M	I>T(48)	AUS	1
M	A>S(38)	KEN	1
M	C>F(33)	USA	1
M	G>V(25)	AUS	1
N	R>K(203)	USA	5359
N	R>K(203)	AUS	543
N	R>K(203)	IND	161
N	R>K(203)	FRA	75
N	R>K(203)	CHN	69
N	R>K(203)	DEU	61
N	R>K(203)	GRC	33
N	R>K(203)	EGY	32
N	R>K(203)	THA	21
N	R>K(203)	HKG	20
N	R>K(203)	TWN	18
N	R>K(203)	SAU	17
N	R>K(203)	ESP	14
N	R>K(203)	ITA	9
N	R>K(203)	CHL	6
N	R>K(203)	CZE	6
N	R>K(203)	BHR	5
N	R>K(203)	JAM	5
N	R>K(203)	MAR	5
N	R>K(203)	BGD	6
N	R>K(203)	POL	4
N	R>K(203)	RUS	4
N	R>K(203)	BRA	3
N	R>K(203)	PAK	3
N	R>K(203)	TUN	3
N	R>K(203)	TUR	3
N	R>K(203)	LKA	2
N	R>K(203)	NLD	2
N	R>K(203)	SRB	2
N	R>K(203)	VNM	2
N	R>K(203)	IRN	3
N	R>K(203)	COL	1
N	R>K(203)	GEO	1
N	R>K(203)	Guangzhou	1
N	R>K(203)	ISR	1
N	R>K(203)	KAZ	1
N	R>K(203)	KEN	2
N	R>K(203)	KOR	1
N	R>K(203)	Morocc0	1
N	R>K(203)	NPL	1
N	R>K(203)	NZL	1
N	R>K(203)	SWE	1
N	R>K(203)	URY	1
N	R>K(203)	ZAF	1
N	G>R(204)	USA	5356
N	G>R(204)	AUS	544
N	G>R(204)	IND	162
N	G>R(204)	FRA	75
N	G>R(204)	CHN	69
N	G>R(204)	DEU	61
N	G>R(204)	GRC	33
N	G>R(204)	EGY	31
N	G>R(204)	THA	21
N	G>R(204)	HKG	20
N	G>R(204)	TWN	18
N	G>R(204)	SAU	17
N	G>R(204)	ESP	14
N	G>R(204)	ITA	9
N	G>R(204)	CHL	6
N	G>R(204)	CZE	6
N	G>R(204)	BHR	5
N	G>R(204)	JAM	5
N	G>R(204)	MAR	5
N	G>R(204)	BGD	6
N	G>R(204)	POL	4
N	G>R(204)	RUS	4
N	G>R(204)	BRA	3
N	G>R(204)	PAK	3
N	G>R(204)	TUN	3
N	G>R(204)	TUR	3
N	G>R(204)	LKA	2
N	G>R(204)	NLD	2
N	G>R(204)	SRB	2
N	G>R(204)	VNM	2
N	G>R(204)	IRN	3
N	G>R(204)	COL	1
N	G>R(204)	GEO	1
N	G>R(204)	Guangzhou	1
N	G>R(204)	ISR	1
N	G>R(204)	KAZ	1
N	G>R(204)	KEN	2
N	G>R(204)	KOR	1
N	G>R(204)	Morocc0	1
N	G>R(204)	NPL	1
N	G>R(204)	NZL	1
N	G>R(204)	SWE	1
N	G>R(204)	URY	1
N	G>R(204)	ZAF	1
N	S>L(194)	USA	315
N	S>L(194)	AUS	193
N	S>L(194)	BGD	124
N	S>L(194)	GRC	54
N	S>L(194)	CZE	17
N	S>L(194)	POL	15
N	S>L(194)	IND	16
N	S>L(194)	DEU	8
N	S>L(194)	SAU	8
N	S>L(194)	FRA	4
N	S>L(194)	ITA	4
N	S>L(194)	RUS	4
N	S>L(194)	SRB	4
N	S>L(194)	TWN	4
N	S>L(194)	BHR	3
N	S>L(194)	ESP	3
N	S>L(194)	HKG	2
N	S>L(194)	TUR	2
N	S>L(194)	BRA	1
N	S>L(194)	CHL	1
N	S>L(194)	CHN	1
N	S>L(194)	ISR	1
N	S>L(194)	KAZ	1
N	S>L(194)	LKA	1
N	S>L(194)	MAR	1
N	S>L(194)	NGA	1
N	S>L(194)	NLD	1
N	S>L(194)	PER	1
N	S>L(194)	THA	1
N	S>L(194)	EGY	1
N	P>L(13)	IND	119
N	P>L(13)	USA	48
N	P>L(13)	AUS	11
N	P>L(13)	BGD	4
N	P>L(13)	SAU	3
N	P>L(13)	HKG	2
N	P>L(13)	DEU	1
N	P>L(13)	TWN	1
N	P>L(13)	GUM	1
N	S>F(235)	AUS	20
N	S>F(235)	IND	20
N	S>F(235)	USA	15
N	S>F(235)	TLS	10
N	S>F(235)	KOR	3
N	S>F(235)	MYS	3
N	S>F(235)	GUM	2
N	S>F(235)	TWN	2
N	S>F(235)	FRA	1
N	S>F(235)	JAM	1
N	S>N(202)	USA	76
N	S>N(202)	EGY	1
N	A>G(208)	USA	38
N	A>G(208)	IND	12
N	A>G(208)	TUN	2
N	A>G(208)	AUS	2
N	A>G(208)	EGY	2
N	A>G(208)	SAU	1
N	A>G(208)	GRC	1
N	E>V(62)	USA	48
N	E>V(62)	TWN	1
N	E>V(62)	AUS	1
N	S>Y(183)	USA	35
N	S>L(197)	USA	50
N	S>L(197)	AUS	5
N	S>L(197)	IND	4
N	S>L(197)	CHN	1
N	S>L(197)	TLS	1
N	T>I(205)	AUS	28
N	T>I(205)	USA	3
N	T>I(205)	IRN	2
N	T>I(205)	DEU	1
N	T>I(205)	IND	1
N	E>A(378)	ESP	11
N	E>A(378)	USA	7
N	E>A(378)	GRC	2
N	E>A(378)	AUS	1
N	E>A(378)	CHL	1
N	E>A(378)	KAZ	1
N	I>T(292)	USA	17
N	I>T(292)	AUS	1
N	T>I(362)	USA	12
N	T>I(362)	AUS	2
N	T>I(362)	BRA	1
N	T>I(362)	CHL	1
N	T>I(362)	BGD	1
N	R>C(185)	USA	18
N	R>C(185)	AUS	1
N	D>G(22)	USA	11
N	D>G(22)	AUS	1
N	D>G(22)	CHN	1
N	D>Y(371)	AUS	13
N	D>Y(371)	USA	1
N	G>C(18)	USA	11
N	Q>H(229)	USA	10
N	Q>H(229)	GRC	5
N	P>S(383)	USA	7
N	P>S(383)	BGD	4
N	D>Y(144)	AUS	6
N	D>Y(144)	USA	5
N	D>Y(144)	IND	1
N	P>S(368)	USA	10
N	S>I(180)	USA	9
N	S>P(188)	USA	6
N	S>P(188)	IND	2
N	R>I(209)	AUS	2
N	R>I(209)	TWN	2
N	R>I(209)	USA	2
N	R>I(209)	TUN	1
N	S>L(327)	USA	7
N	S>L(327)	AUS	1
N	S>L(188)	USA	6
N	S>L(188)	AUS	1
N	S>I(190)	USA	7
N	T>I(393)	USA	6
N	T>I(393)	AUS	1
N	T>I(393)	GRC	1
N	R>I(89)	USA	6
N	S>F(186)	USA	5
N	L>F(139)	USA	6
N	R>L(185)	AUS	4
N	S>I(193)	USA	4
N	S>I(193)	IND	1
N	D>G(377)	IND	2
N	D>G(377)	USA	3
N	P>L(326)	BGD	4
N	K>R(169)	USA	3
N	K>R(169)	SAU	1
N	A>V(155)	USA	4
N	A>V(119)	USA	5
N	R>I(195)	DEU	3
N	R>I(195)	USA	1
N	R>M(203)	USA	3
N	R>M(203)	KAZ	1
N	M>I(234)	AUS	3
N	M>I(234)	USA	2
N	M>I(234)	SRB	1
N	T>I(334)	USA	4
N	T>I(334)	SRB	1
N	T>I(271)	GRC	1
N	T>I(271)	IND	2
N	T>I(271)	USA	1
N	P>L(365)	AUS	2
N	P>L(365)	USA	1
N	Q>H(384)	USA	3
N	A>V(381)	USA	3
N	N>Y(228)	USA	2
N	N>Y(228)	GRC	1
N	N>Y(213)	AUS	3
N	R>S(203)	USA	2
N	R>S(203)	SRB	1
N	A>S(156)	USA	5
N	A>S(156)	AUS	2
N	P>S(142)	IND	3
N	D>Y(128)	USA	3
N	P>T(67)	USA	3
N	T>I(24)	USA	3
N	S>I(33)	USA	2
N	I>F(146)	IND	2
N	T>I(166)	USA	2
N	S>N(193)	GRC	1
N	S>N(193)	USA	1
N	G>C(243)	USA	2
N	G>C(243)	IND	1
N	G>C(212)	USA	2
N	G>C(238)	USA	4
N	T>I(247)	COL	1
N	T>I(247)	USA	1
N	S>F(255)	FRA	1
N	S>F(255)	USA	1
N	Q>H(289)	AUS	2
N	Y>H(298)	USA	2
N	P>L(364)	USA	2
N	Q>H(386)	USA	2
N	Q>H(386)	SAU	1
N	T>I(391)	USA	2
N	S>L(416)	IND	1
N	S>L(416)	USA	1
N	D>Y(402)	USA	2
N	A>S(397)	POL	2
N	D>Y(377)	USA	2
N	P>S(365)	USA	2
N	P>S(344)	USA	2
N	D>N(340)	CHN	1
N	D>N(340)	IND	1
N	G>S(200)	USA	2
N	P>S(199)	USA	2
N	A>S(152)	USA	3
N	A>S(152)	GUM	1
N	D>H(144)	USA	3
N	P>S(67)	USA	2
N	A>S(35)	USA	3
N	G>L(34)	USA	2
N	G>W(34)	USA	2
N	D>Y(22)	IND	2
N	D>Y(22)	USA	1
N	G>R(19)	USA	2
N	P>T(13)	USA	2
N	N>D(4)	USA	2
N	P>L(6)	USA	1
N	S>R(232)	USA	2
N	Q>H(9)	AUS	1
N	D>Y(297)	USA	1
N	R>S(92)	IND	1
N	R>H(14)	IND	1
N	P>L(20)	USA	2
N	N>S(192)	USA	1
N	G>F(25)	USA	1
N	G>A(30)	TUN	1
N	R>L(32)	USA	1
N	R>L(36)	USA	1
N	S>L(37)	USA	1
N	R>C(40)	USA	1
N	R>L(40)	USA	1
N	Q>H(70)	USA	1
N	R>L(95)	AUS	1
N	S>N(105)	AUS	1
N	P>L(122)	USA	1
N	T>I(135)	USA	1
N	P>L(151)	IND	1
N	Q>K(163)	USA	1
N	T>I(165)	AUS	1
N	L>F(167)	USA	1
N	S>G(180)	BGD	1
N	S>L(187)	USA	2
N	Q>L(260)	USA	1
N	R>H(191)	USA	1
N	R>L(191)	USA	2
N	R>G(203)	IND	1
N	V>L(270)	IND	1
N	V>L(270)	USA	1
N	P>L(383)	IND	1
N	P>L(383)	USA	1
N	S>I(413)	BGD	1
N	S>I(413)	USA	1
N	D>Y(348)	USA	2
N	D>Y(348)	GRC	1
N	D>Y(348)	MAR	1
N	H>Y(300)	IND	1
N	A>V(218)	IND	1
N	A>V(218)	USA	1
N	R>K(195)	IND	1
N	T>I(198)	KEN	1
N	T>I(198)	AUS	1
N	L>F(230)	USA	1
N	P>R(364)	DEU	1
N	K>N(373)	GRC	1
N	K>N(373)	AUS	1
N	M>V(322)	BGD	1
N	R>I(385)	AUS	1
N	P>L(207)	USA	1
N	R>K(209)	USA	1
N	M>I(210)	USA	1
N	G>C(215)	USA	1
N	S>I(232)	USA	1
N	S>P(235)	USA	1
N	G>C(236)	USA	1
N	V>A(246)	AUS	1
N	S>F(250)	USA	1
N	S>A(255)	USA	1
N	Q>E(260)	USA	1
N	T>I(282)	HKG	1
N	T>I(282)	AUS	1
N	G>E(284)	EGY	1
N	Q>L(289)	USA	1
N	Q>L(294)	USA	1
N	W>C(301)	USA	1
N	P>L(309)	AUS	1
N	G>D(321)	USA	1
N	M>I(322)	USA	1
N	T>I(325)	USA	1
N	T>M(329)	AUS	1
N	W>L(330)	USA	1
N	I>F(337)	USA	1
N	K>I(361)	USA	1
N	T>I(379)	KOR	1
N	Q>H(380)	USA	1
N	Q>K(386)	USA	1
N	D>Y(401)	USA	1
N	D>E(399)	TUN	1
N	D>H(399)	USA	1
N	A>S(398)	USA	1
N	A>V(398)	LKA	1
N	A>S(376)	USA	1
N	K>R(372)	USA	1
N	D>H(348)	USA	1
N	D>G(340)	USA	1
N	P>S(326)	USA	1
N	I>V(320)	AUS	1
N	A>S(311)	USA	1
N	R>L(319)	USA	1
N	P>S(302)	AUS	1
N	A>S(252)	IND	1
N	K>R(249)	USA	1
N	K>T(237)	USA	1
N	G>V(236)	USA	1
N	S>T(232)	USA	1
N	A>T(220)	USA	1
N	G>V(215)	USA	1
N	A>S(211)	USA	1
N	R>T(209)	USA	2
N	T>A(247)	USA	1
N	P>S(207)	USA	1
N	P>T(199)	USA	1
N	S>T(180)	AUS	1
N	P>Q(168)	BGD	1
N	Q>R(163)	TWN	1
N	I>T(157)	USA	1
N	N>Y(154)	AUS	1
N	P>S(151)	BGD	1
N	H>Y(145)	USA	1
N	N>T(140)	TWN	1
N	A>V(134)	USA	1
N	D>H(128)	IND	1
N	A>T(125)	USA	1
N	G>R(120)	USA	1
N	A>S(119)	IND	1
N	G>S(97)	THA	1
N	A>S(90)	IND	1
N	Q>R(83)	USA	1
N	D>Y(81)	BGD	1
N	S>T(79)	USA	1
N	D>N(63)	USA	1
N	N>S(196)	USA	1
N	G>R(60)	USA	1
N	P>S(46)	AUS	1
N	Q>R(43)	USA	1
N	K>N(342)	USA	1
N	A>T(35)	USA	1
N	A>V(35)	USA	1
N	T>R(325)	USA	1
N	D>N(22)	EGY	1
N	G>V(18)	IND	1
N	N>S(11)	USA	1
N	P>T(6)	BGD	1
N	P>T(6)	IND	2
N	S>T(23)	IND	1
N	D>Y(3)	USA	1
S	D>G(614)	USA	5303
S	D>G(614)	IND	333
S	D>G(614)	AUS	314
S	D>G(614)	BGD	139
S	D>G(614)	GRC	95
S	D>G(614)	CHN	78
S	D>G(614)	FRA	78
S	D>G(614)	EGY	52
S	D>G(614)	DEU	52
S	D>G(614)	SAU	28
S	D>G(614)	CZE	20
S	D>G(614)	POL	20
S	D>G(614)	HKG	19
S	D>G(614)	THA	23
S	D>G(614)	TWN	22
S	D>G(614)	ESP	23
S	D>G(614)	SRB	11
S	D>G(614)	CHL	9
S	D>G(614)	ITA	13
S	D>G(614)	MAR	7
S	D>G(614)	RUS	8
S	D>G(614)	BHR	8
S	D>G(614)	TUR	5
S	D>G(614)	JAM	6
S	D>G(614)	KOR	4
S	D>G(614)	TLS	4
S	D>G(614)	GUM	3
S	D>G(614)	PAK	3
S	D>G(614)	TUN	7
S	D>G(614)	IRN	2
S	D>G(614)	KAZ	4
S	D>G(614)	LKA	4
S	D>G(614)	MYS	2
S	D>G(614)	VNM	2
S	D>G(614)	BRA	5
S	D>G(614)	NLD	2
S	D>G(614)	COL	2
S	D>G(614)	Guangzhou	1
S	D>G(614)	ISR	2
S	D>G(614)	KEN	1
S	D>G(614)	NPL	1
S	D>G(614)	URY	1
S	D>G(614)	FRA	1
S	D>G(614)	GEO	1
S	D>G(614)	Morocc0	1
S	D>G(614)	NGA	1
S	D>G(614)	NZL	1
S	D>G(614)	PER	1
S	L>F(54)	USA	3370
S	L>F(54)	IND	192
S	L>F(54)	AUS	161
S	L>F(54)	BGD	120
S	L>F(54)	GRC	68
S	L>F(54)	FRA	50
S	L>F(54)	EGY	41
S	L>F(54)	DEU	40
S	L>F(54)	SAU	24
S	L>F(54)	CZE	20
S	L>F(54)	POL	19
S	L>F(54)	TWN	12
S	L>F(54)	ESP	11
S	L>F(54)	SRB	10
S	L>F(54)	CHL	9
S	L>F(54)	ITA	9
S	L>F(54)	THA	9
S	L>F(54)	MAR	7
S	L>F(54)	RUS	7
S	L>F(54)	BHR	6
S	L>F(54)	TUR	5
S	L>F(54)	CHN	3
S	L>F(54)	TUN	3
S	L>F(54)	BRA	2
S	L>F(54)	JAM	2
S	L>F(54)	KAZ	2
S	L>F(54)	LKA	2
S	L>F(54)	NLD	2
S	L>F(54)	COL	1
S	L>F(54)	FRA	1
S	L>F(54)	GEO	1
S	L>F(54)	HKG	1
S	L>F(54)	ISR	1
S	L>F(54)	Morocc0	1
S	L>F(54)	NGA	1
S	L>F(54)	NZL	1
S	L>F(54)	PER	1
S	L>F(5)	IND	52
S	L>F(5)	THA	38
S	L>F(5)	AUS	4
S	L>F(5)	HKG	3
S	L>F(5)	BGD	3
S	L>F(5)	USA	4
S	S>N(477)	USA	34
S	S>N(477)	FRA	2
S	S>N(477)	AUS	1
S	S>N(477)	BGD	1
S	S>N(477)	ITA	1
S	A>T(829)	AUS	37
S	V>A(483)	USA	24
S	V>A(483)	FRA	1
S	H>Y(146)	USA	22
S	H>Y(146)	AUS	4
S	S>L(221)	USA	23
S	P>L(681)	USA	16
S	P>L(681)	AUS	1
S	D>G(253)	USA	16
S	D>G(253)	CHN	1
S	Q>H(677)	USA	16
S	Q>H(677)	FRA	2
S	Q>H(677)	AUS	1
S	N>Y(501)	EGY	6
S	N>Y(501)	IND	6
S	N>Y(501)	AUS	1
S	T>I(572)	AUS	13
S	T>I(572)	IND	1
S	T>I(572)	TUN	1
S	E>D(583)	IND	11
S	E>D(583)	USA	5
S	E>D(583)	FRA	1
S	D>H(138)	IND	9
S	D>H(138)	USA	11
S	D>H(138)	AUS	1
S	E>D(554)	IND	9
S	E>D(554)	USA	5
S	E>D(554)	AUS	1
S	Q>H(14)	USA	10
S	Q>H(14)	IND	1
S	R>M(78)	USA	7
S	R>M(78)	BGD	1
S	R>M(78)	AUS	1
S	V>L(308)	IND	8
S	R>K(403)	USA	8
S	G>V(1124)	USA	13
S	G>V(1124)	AUS	1
S	G>V(1124)	CHN	1
S	A>S(845)	AUS	7
S	A>S(845)	CHN	1
S	A>S(845)	USA	1
S	P>L(1263)	FRA	5
S	P>L(1263)	USA	6
S	P>L(1263)	CHN	3
S	P>L(1263)	SAU	1
S	A>D(845)	USA	5
S	A>D(845)	GRC	3
S	T>I(791)	USA	10
S	T>I(791)	GRC	1
S	G>D(838)	TWN	6
S	G>D(838)	USA	2
S	H>Y(655)	USA	7
S	T>I(859)	USA	5
S	T>I(859)	CHN	2
S	T>I(859)	SAU	1
S	S>F(939)	USA	7
S	G>S(476)	USA	6
S	G>S(476)	BGD	2
S	F>L(220)	USA	9
S	H>Y(49)	AUS	2
S	H>Y(49)	BGD	3
S	H>Y(49)	USA	5
S	M>I(153)	AUS	2
S	M>I(153)	USA	2
S	M>I(153)	BGD	2
S	M>I(153)	SRB	1
S	M>I(153)	CHN	1
S	L>F(1203)	USA	3
S	L>F(1203)	AUS	1
S	L>F(1203)	IND	1
S	A>S(520)	AUS	5
S	A>S(520)	USA	1
S	T>I(29)	USA	5
S	T>I(29)	BGD	2
S	T>I(29)	CHN	1
S	T>I(29)	AUS	1
S	S>L(50)	USA	4
S	S>L(50)	KOR	1
S	S>L(50)	CHN	1
S	S>L(50)	AUS	1
S	Y>H(145)	USA	4
S	L>F(216)	USA	4
S	W>L(258)	USA	4
S	W>L(258)	IND	1
S	W>L(258)	DEU	1
S	Q>H(675)	USA	3
S	Q>H(675)	IND	1
S	A>T(262)	USA	3
S	A>T(262)	BGD	1
S	T>I(22)	USA	5
S	S>F(71)	IRN	2
S	S>F(71)	DEU	1
S	S>P(494)	USA	3
S	T>I(547)	USA	4
S	S>L(704)	USA	3
S	S>L(704)	CHN	1
S	S>L(704)	AUS	1
S	S>F(940)	USA	3
S	D>N(1260)	USA	4
S	G>R(1085)	AUS	3
S	Q>L(836)	USA	3
S	S>I(929)	USA	3
S	H>Y(1101)	USA	3
S	H>Y(1101)	BGD	1
S	A>S(1078)	USA	4
S	A>S(879)	USA	3
S	A>S(262)	IND	3
S	A>S(262)	USA	1
S	I>V(197)	USA	3
S	L>V(8)	GRC	2
S	L>V(8)	CHL	1
S	T>I(95)	HKG	3
S	T>I(95)	USA	2
S	T>I(95)	BRA	1
S	T>I(95)	CHN	1
S	T>I(95)	AUS	1
S	S>F(12)	USA	3
S	L>F(18)	IND	2
S	L>F(18)	USA	1
S	E>K(180)	USA	2
S	T>N(22)	AUS	2
S	S>L(698)	AUS	2
S	S>L(698)	USA	1
S	P>L(26)	USA	2
S	N>K(74)	TUN	1
S	N>K(74)	USA	1
S	S>F(98)	USA	5
S	W>L(152)	USA	2
S	M>I(177)	IND	2
S	R>L(214)	IND	2
S	S>F(255)	USA	2
S	P>L(384)	BHR	1
S	P>L(384)	IND	1
S	R>I(408)	USA	2
S	T>I(553)	EGY	2
S	Q>R(675)	USA	3
S	Q>R(675)	AUS	1
S	M>I(731)	AUS	1
S	M>I(731)	IND	1
S	M>I(731)	USA	1
S	T>I(1136)	AUS	1
S	T>I(1136)	USA	1
S	S>F(640)	USA	2
S	T>I(676)	USA	2
S	P>L(1162)	USA	2
S	V>L(1230)	FRA	2
S	L>F(922)	USA	2
S	V>L(1065)	USA	2
S	V>L(1104)	USA	3
S	V>L(1122)	BGD	1
S	V>L(1122)	IND	1
S	V>L(1122)	SWE	1
S	V>L(1122)	USA	1
S	K>N(1191)	USA	2
S	K>N(1191)	BGD	1
S	A>V(1078)	BGD	1
S	A>V(1078)	USA	2
S	A>V(1020)	USA	2
S	I>V(931)	FRA	1
S	I>V(931)	USA	1
S	A>V(846)	AUS	2
S	P>S(812)	AUS	1
S	P>S(812)	USA	1
S	P>S(812)	CHN	1
S	A>S(783)	USA	3
S	A>V(570)	USA	2
S	A>V(570)	FRA	1
S	A>V(570)	EGY	1
S	P>S(330)	USA	2
S	R>S(273)	USA	2
S	I>M(203)	USA	2
S	V>A(1129)	USA	2
S	D>N(111)	USA	2
S	D>Y(88)	USA	2
S	C>F(1250)	USA	2
S	C>F(1250)	ITA	1
S	D>Y(80)	USA	2
S	H>Y(69)	USA	2
S	F>L(32)	DEU	1
S	F>L(32)	USA	1
S	F>L(32)	TWN	1
S	A>S(27)	USA	2
S	P>S(25)	USA	2
S	S>I(162)	USA	1
S	P>L(9)	IND	1
S	S>C(12)	USA	1
S	S>I(13)	EGY	1
S	D>Y(1118)	IND	1
S	N>K(17)	USA	1
S	R>I(21)	USA	1
S	T>A(22)	AUS	1
S	P>L(25)	USA	1
S	P>L(25)	HKG	1
S	V>F(367)	USA	2
S	V>F(367)	HKG	2
S	R>Q(682)	USA	1
S	R>Q(682)	HKG	1
S	Q>E(1002)	USA	1
S	Y>H(28)	HKG	1
S	Y>H(28)	IND	1
S	Y>N(28)	USA	1
S	Y>C(38)	AUS	1
S	F>S(86)	AUS	1
S	E>G(96)	AUS	1
S	S>G(151)	AUS	1
S	N>K(185)	AUS	1
S	G>V(142)	AUS	1
S	S>I(155)	USA	1
S	S>I(155)	FRA	1
S	Q>H(690)	IND	1
S	E>Q(471)	IND	1
S	V>F(70)	IND	1
S	T>I(76)	USA	2
S	H>Q(1083)	AUS	1
S	H>Q(1083)	IND	1
S	D>A(88)	IND	1
S	V>F(90)	USA	1
S	E>D(96)	USA	1
S	R>I(102)	USA	1
S	L>F(118)	USA	1
S	V>F(127)	USA	1
S	E>D(132)	BGD	1
S	S>I(151)	USA	1
S	W>R(152)	USA	1
S	E>D(156)	IND	1
S	Q>H(173)	IND	1
S	L>F(176)	IND	1
S	L>I(176)	USA	1
S	N>D(188)	FRA	1
S	N>K(188)	GRC	1
S	R>K(190)	TUR	1
S	Y>S(200)	USA	1
S	I>S(818)	USA	1
S	V>L(213)	CHN	1
S	Q>L(218)	ESP	1
S	S>F(691)	USA	1
S	T>I(240)	USA	2
S	L>F(242)	FRA	1
S	S>R(247)	USA	1
S	Y>H(248)	AUS	1
S	G>S(594)	AUS	1
S	S>F(254)	BGD	1
S	S>F(254)	DEU	1
S	Y>C(265)	AUS	1
S	V>L(267)	USA	1
S	R>M(273)	USA	1
S	F>Y(275)	USA	1
S	L>I(276)	USA	1
S	S>I(750)	USA	1
S	Y>N(279)	CHN	1
S	T>I(307)	TUN	1
S	Q>K(314)	USA	1
S	Q>L(314)	USA	1
S	T>I(315)	USA	1
S	Q>L(321)	USA	1
S	T>I(323)	USA	2
S	C>F(1248)	USA	1
S	T>S(345)	USA	1
S	N>K(354)	USA	1
S	V>E(382)	USA	1
S	V>L(382)	FRA	1
S	T>P(393)	USA	1
S	R>K(457)	GRC	1
S	V>A(622)	USA	1
S	V>F(483)	USA	1
S	K>E(529)	AUS	1
S	T>N(553)	USA	1
S	P>L(561)	FRA	1
S	Q>H(580)	AUS	1
S	Q>K(1201)	IND	1
S	L>F(611)	IND	1
S	Q>H(613)	FRA	1
S	Q>K(675)	IND	1
S	S>R(750)	AUS	1
S	L>R(752)	AUS	1
S	L>R(752)	USA	1
S	V>I(772)	CHN	1
S	F>C(797)	TUR	1
S	G>C(1219)	GRC	1
S	V>L(1228)	THA	1
S	V>L(1228)	TWN	1
S	M>I(1237)	USA	1
S	D>H(1259)	USA	1
S	C>F(1254)	USA	1
S	C>Y(1250)	AUS	1
S	G>V(1219)	USA	1
S	K>N(1205)	USA	1
S	N>T(1192)	USA	1
S	D>H(1168)	USA	1
S	D>G(1163)	USA	1
S	P>S(1162)	AUS	1
S	P>S(1162)	IND	1
S	P>S(1162)	USA	1
S	A>V(930)	USA	1
S	A>V(845)	IND	1
S	A>V(845)	USA	1
S	G>S(838)	USA	1
S	D>G(745)	AUS	1
S	A>T(684)	USA	1
S	R>W(682)	USA	1
S	R>W(682)	SAU	1
S	A>V(653)	TWN	1
S	V>F(615)	CHN	1
S	V>F(622)	USA	2
S	V>I(622)	SAU	1
S	S>A(640)	USA	1
S	T>S(676)	EGY	1
S	S>F(708)	USA	1
S	T>A(724)	USA	1
S	T>A(732)	SAU	1
S	M>I(740)	USA	1
S	N>D(751)	POL	1
S	L>F(1141)	POL	1
S	R>L(765)	USA	1
S	T>I(768)	TWN	1
S	T>I(778)	USA	1
S	Y>D(789)	USA	1
S	A>S(1020)	GRC	1
S	T>I(827)	USA	1
S	G>C(832)	IND	1
S	Q>P(836)	THA	1
S	L>F(981)	USA	1
S	L>F(1063)	USA	1
S	T>I(1120)	BHR	1
S	P>L(1143)	USA	1
S	V>F(1176)	USA	1
S	N>K(1187)	BRA	1
S	V>L(1264)	IND	1
S	D>H(1260)	USA	1
S	C>F(1247)	IND	1
S	G>S(1246)	USA	1
S	C>F(1243)	USA	1
S	C>F(1243)	IND	1
S	M>T(1237)	IND	1
S	E>Q(1195)	USA	1
S	N>Y(1187)	USA	1
S	K>R(1181)	USA	1
S	F>L(1109)	USA	1
S	P>S(1079)	GRC	1
S	S>Y(939)	AUS	1
S	D>Y(936)	BGD	1
S	A>V(924)	USA	1
S	A>S(892)	USA	1
S	A>V(892)	GRC	1
S	A>V(879)	IND	1
S	K>R(854)	USA	1
S	D>N(839)	USA	1
S	I>V(818)	AUS	1
S	P>S(809)	USA	1
S	D>G(808)	IND	1
S	K>Q(795)	USA	1
S	G>V(769)	IND	1
S	R>S(765)	GRC	1
S	A>S(706)	USA	1
S	A>S(706)	IND	1
S	A>V(701)	IND	1
S	A>V(688)	USA	1
S	A>S(684)	IND	1
S	A>V(684)	USA	1
S	Q>R(677)	USA	1
S	A>V(672)	BGD	1
S	A>S(647)	USA	1
S	P>S(631)	USA	1
S	A>V(626)	USA	1
S	A>S(623)	AUS	1
S	P>S(621)	USA	1
S	D>Y(574)	USA	1
S	D>Y(574)	IND	1
S	D>Y(1153)	USA	1
S	A>S(570)	BGD	1
S	K>R(558)	CHN	1
S	A>S(522)	DEU	1
S	A>V(522)	USA	1
S	H>Q(519)	USA	2
S	G>R(485)	AUS	1
S	G>R(485)	BGD	1
S	C>F(379)	CHN	1
S	A>S(348)	FRA	1
S	A>T(348)	USA	1
S	E>Q(309)	USA	1
S	E>G(298)	USA	1
S	E>K(298)	USA	1
S	K>N(300)	USA	1
S	T>L(302)	USA	1
S	P>T(812)	USA	1
S	A>T(288)	CHN	1
S	Q>R(314)	CHN	1
S	Q>R(271)	TUN	1
S	G>R(261)	IND	1
S	G>S(252)	BGD	1
S	H>R(245)	USA	1
S	Q>R(239)	USA	1
S	A>P(222)	USA	1
S	A>V(222)	USA	1
S	L>I(441)	USA	1
S	R>L(1091)	USA	1
S	N>Y(211)	USA	1
S	D>N(178)	BGD	1
S	R>S(158)	AUS	1
S	F>L(157)	USA	2
S	N>S(148)	USA	2
S	N>Y(148)	USA	1
S	K>T(97)	IND	1
S	G>V(75)	USA	2
S	A>S(67)	BGD	1
S	F>L(1103)	BGD	1
S	A>V(67)	CHN	1
S	S>F(884)	BGD	1
S	A>V(27)	USA	1
S	L>V(7)	USA	1
